# Supplementary material for: The detrimental invasiveness of glioma cells controlled by gadolinium chelate-coated gold nanoparticles
Source: Royal Society of Chemistry journal article supplement (doi:10.1039/d0nr08936b), 2021-01-01
Supplement: d0nr08936b2.pdf [file d0nr08936b2.pdf]

**Movie1: Individual cell motion tracking by time-lapse videomicroscopy imaging**

Untreated or Au@DTDTPA(Gd)-treated U251 cells seeded on fibronectin were observed under a  $\times 20$  *magnification* objective during 24 h using the MetaMorph software (Roper Scientific). Cell velocity, distance and directional persistence were calculated with chemotaxis and migration tool ImageJ plugin. Exposition to Au@DTDTPA(Gd) leads to a fast turnover of lamellipodia in any direction, and both reduced directional displacement and reduced apparent velocity.

**Movie 2: Analysis of force generation by U251 cells using Traction Force Microscopy**

Video TFM analysis of single cells with the force represented as magnitude (upper panels) and vectors (lower panels) of control (left) and Au@DTDTPA(Gd) nanoparticles uptaken (right) cells superimposed with the cell segmentation used for the force integration.
